# Supplementary material for: A composite biomarker of neutrophil-lymphocyte ratio and hemoglobin level correlates with clinical response to PD-1 and PD-L1 inhibitors in advanced non-small cell lung cancers
Source: PubMed Central journal article supplement (PMC8059160; doi:10.1186/s12885-021-08194-9), 2021-04-21

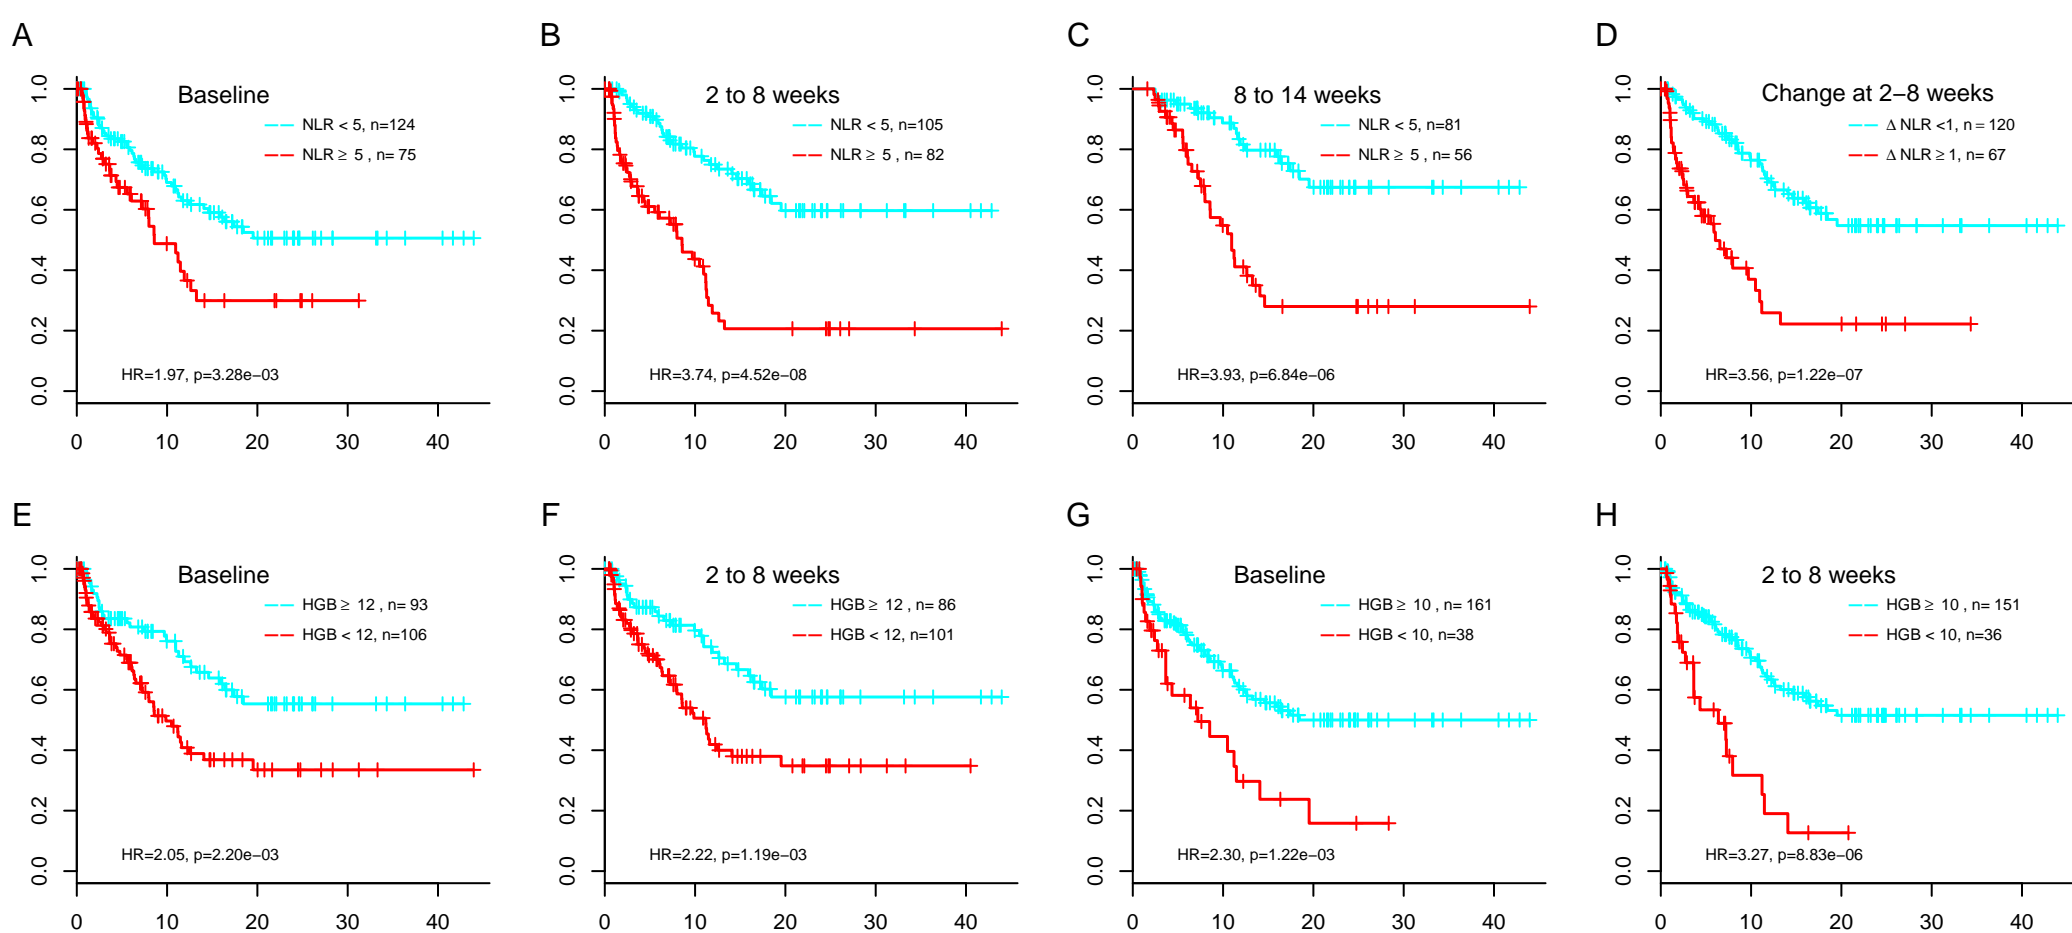

Supplement: 12885_2021_8194_MOESM3_ESM.pdf [file 12885_2021_8194_MOESM3_ESM.pdf]
