# Supplementary material for: A composite biomarker of neutrophil-lymphocyte ratio and hemoglobin level correlates with clinical response to PD-1 and PD-L1 inhibitors in advanced non-small cell lung cancers
Source: Springer Nature journal article supplement (doi:10.1186/s12885-021-08194-9), 2021-04-21

# Baseline Labs Without Concurrent Chemotherapy

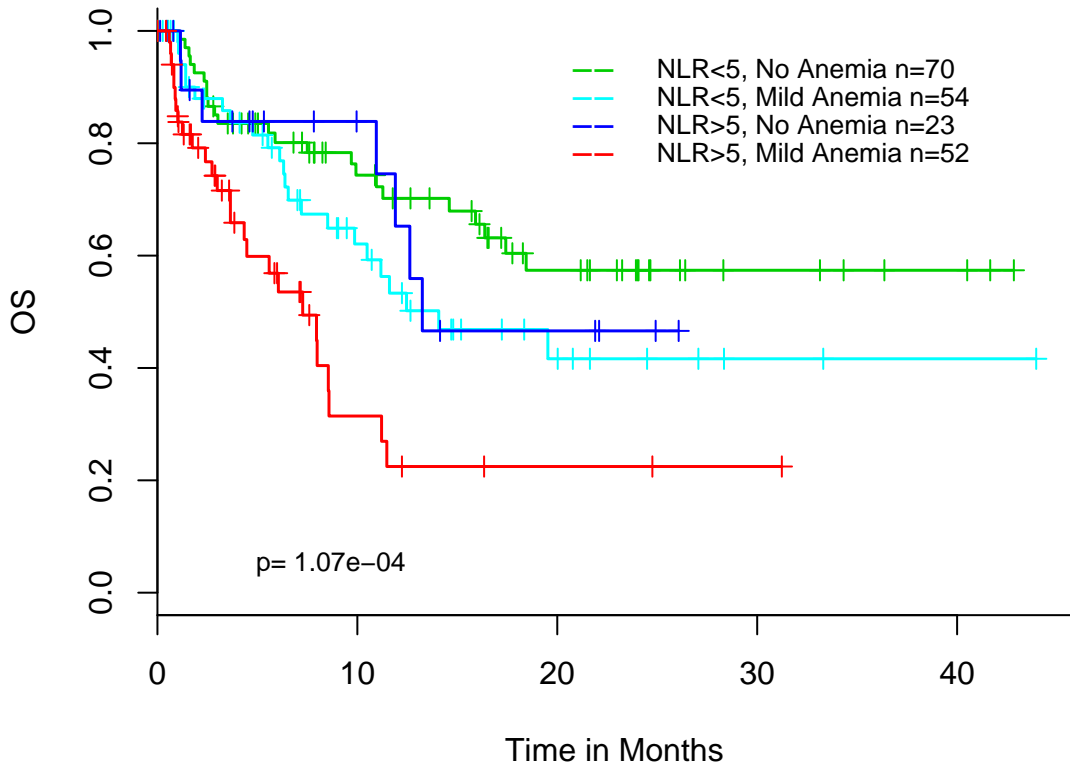

Supplement: MOESM4 [file 19091320]
